# Supplementary material for: Covalently bonded multimers of Au25(SBut)18 as a conjugated system
Source: Royal Society of Chemistry journal article supplement (doi:10.1039/c8nr01902a), 2018-01-01

## Covalently bonded multimers of $\text{Au}_{25}(\text{SBut})_{18}$ as a conjugated system

-

### SUPPORTING INFORMATION

Annelies Sels<sup>1</sup>, Giovanni Salassa<sup>1</sup>, Fabrice Cousin<sup>2</sup>, Lay-Theng Lee,<sup>2</sup> Thomas Bürgi<sup>1</sup>

<sup>1</sup> Department of Physical Chemistry, University of Geneva, 30 Quai Ernest-Ansermet, 1211 Geneva 4, Switzerland.

<sup>2</sup> CEA Saclay, UMR CEA CNRS 12, Lab Leon Brillouin, F-91191 Gif Sur Yvette, France

\*: corresponding author, [Thomas.Buergi@unige.ch](mailto:Thomas.Buergi@unige.ch)

*Table of contents:*

*Figure S1: NMR on disulfide formation*

*Figure S2: comparison of SEC of  $\text{Au}_{25}(\text{SBut})_{18}$  and multimers*

*Figure S3: reference UV and MALDI of pure  $\text{Au}_{25}(\text{SBut})_{18}$*

*Figure S4: Full MALDI after SEC of the multimers*

*Figure S5: Full NMR spectrum after kinetics*

*Figure S6: MALDI, NMR and kinetics of thiophenol exchange reaction*

*Figure S7: MALDI and full UV spectra of the unlinking reaction*

*Figure S8: Reverse ligand exchange with the precipitate*

*Figure S9: Linking reaction of  $\text{Au}_{25}(\text{PET})_{18-x}(\mathbf{1})_x$  and  $\text{Au}_{25}(\text{PET})_{18-x}(\mathbf{2})_x$*

*Figure S10: Linking reaction of  $\text{Au}_{25}(\text{Sbut})_{18-x}(\mathbf{3})_x$*

*Figure S11: UV-Vis comparison of the first eluting fractions after linking*

*Figure S12: UV-vis of samples for SAXS*

*Figure S13: Fitting of SAXS curves by SASVIEW (second fractions)*

Figure S1: NMR investigation on the disulfide formation of linker **1**. Pure **1** (red), **1** at 0h of the stability test (green) and **1** at 24h of the stability test (blue). No change is observed after 24h. The sample at 0h already shows some disulfide signals because of preparation from an original DCM solution to a DCM-d2 solution.

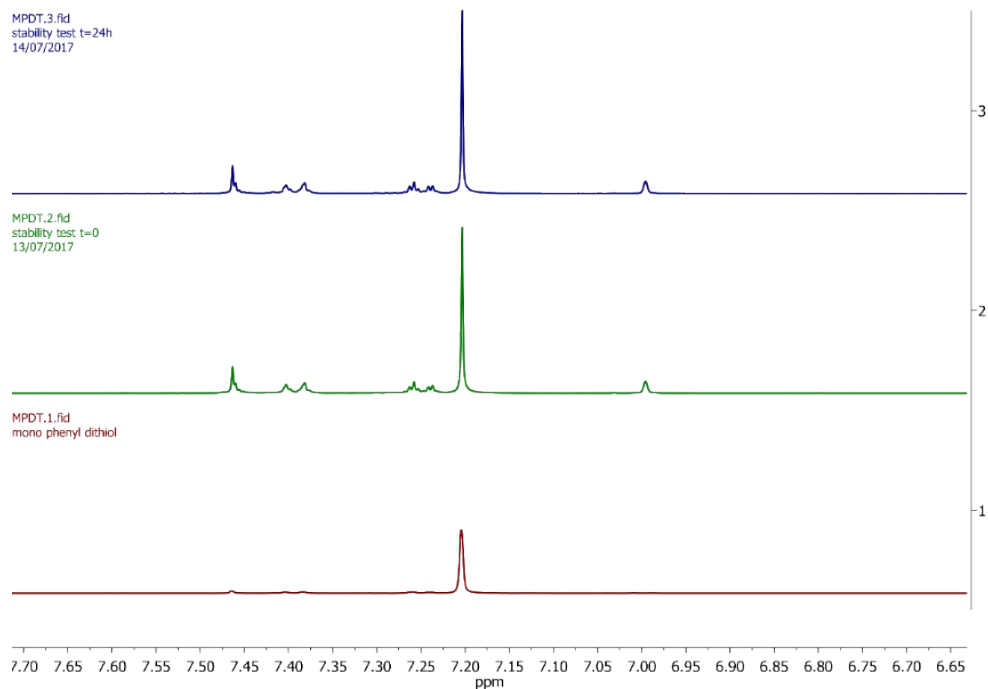

Figure S2: SEC of 2 mg  $Au_{25}(SBut)_{18}$  (left column) and 2 mg of reaction mixture  $Au_{25}(SBut)_{18} + \mathbf{1}$  (right column). It can be observed that the first eluting species of the multimers are eluting much faster than reference  $Au_{25}$ .

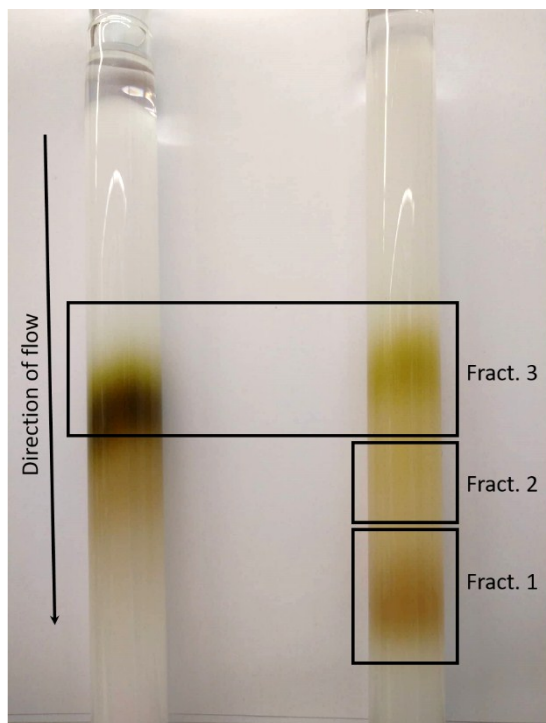

Figure S3: Reference UV (left) and MALDI (right) of pure  $Au_{25}(SBut)_{18}$ . The target mass peak of  $Au_{25}(SBut)_{18}$  is at  $m/z$  6529, but peaks at lower  $m/z$  present the fragmentation pattern of the loss of  $Au_1(SBut)_1$

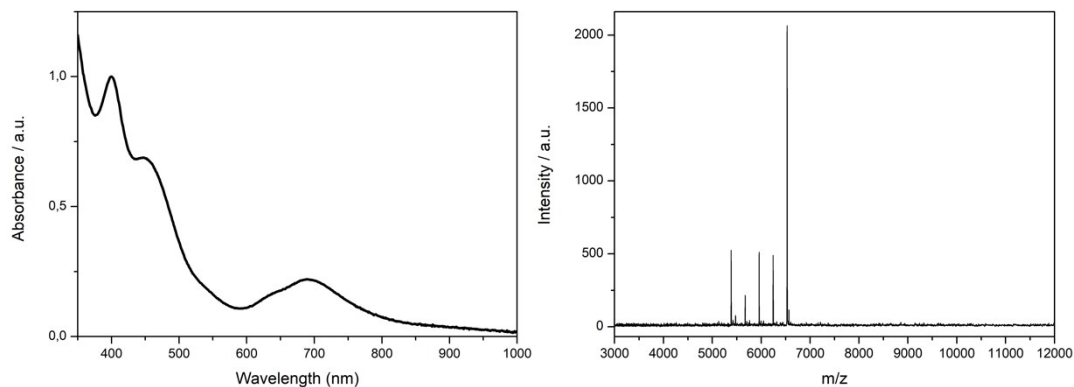

Figure S4: Full MALDI characterization of separated fractions after size exclusion chromatography

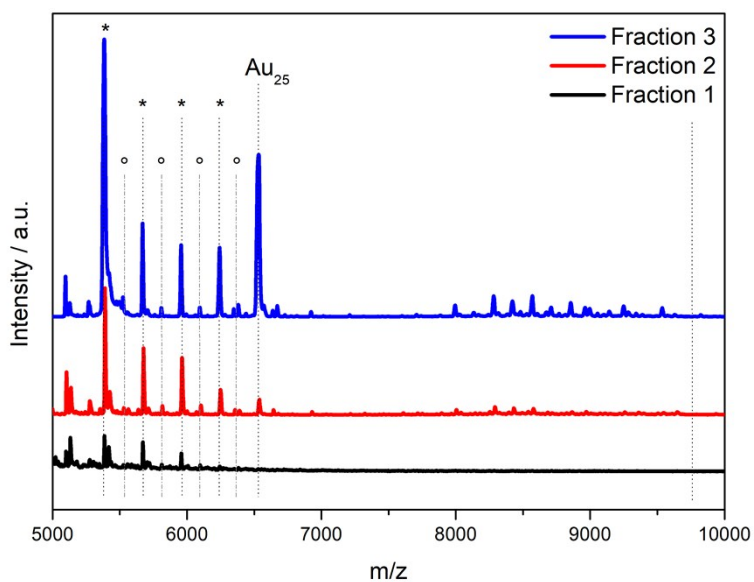

Figure S5: Full NMR spectrum after kinetics 3. Red and yellow are signals resulting from linker 1; green and blue are signals originating from butanethiol. Linking reaction with addition of 0.5 equiv of 1, 5 mg/ mL in DCM-2d.

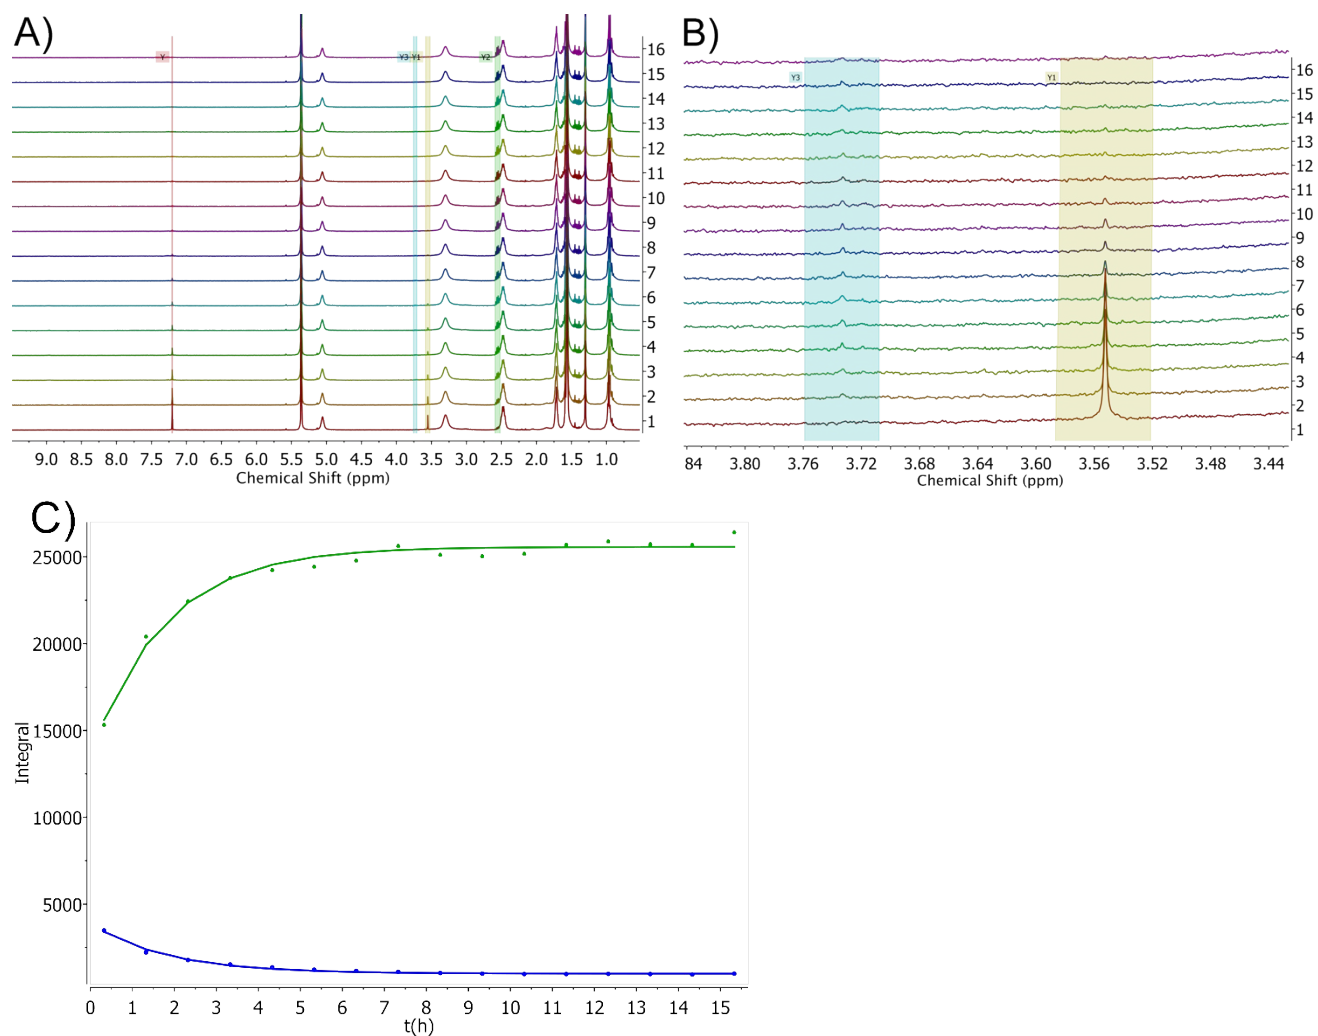

| $y=B + F \exp(-xG)$  | Entering PhSH (3.55 ppm) | Leaving ButSH (2.55 ppm) |
|----------------------|--------------------------|--------------------------|
| B                    | 1002.9                   | 25573.6                  |
| F                    | 2881.03                  | -12011                   |
| G                    | 0.551453                 | 0.568001                 |
| Sum of B             | 26576.5                  |                          |
| Ratio at equilibrium | <b>0.038</b>             | <b>0.962</b>             |

Figure S6: NMR (A, B), kinetics (C) and MALDI (D) of thiophenol exchange reaction. Exchange reaction was performed with 0.1 equiv of thiophenol, 4 mg/mL in DCM-2d. NMR comparison (E) of pure  $Au_{25}(SBut)_{18}$  with  $Au_{25}(SBut)_{18-x}(SPh)_x$  after exchange reaction confirms thiophenol exchanged species which can be the only reason for the NMR signal at 9 ppm.

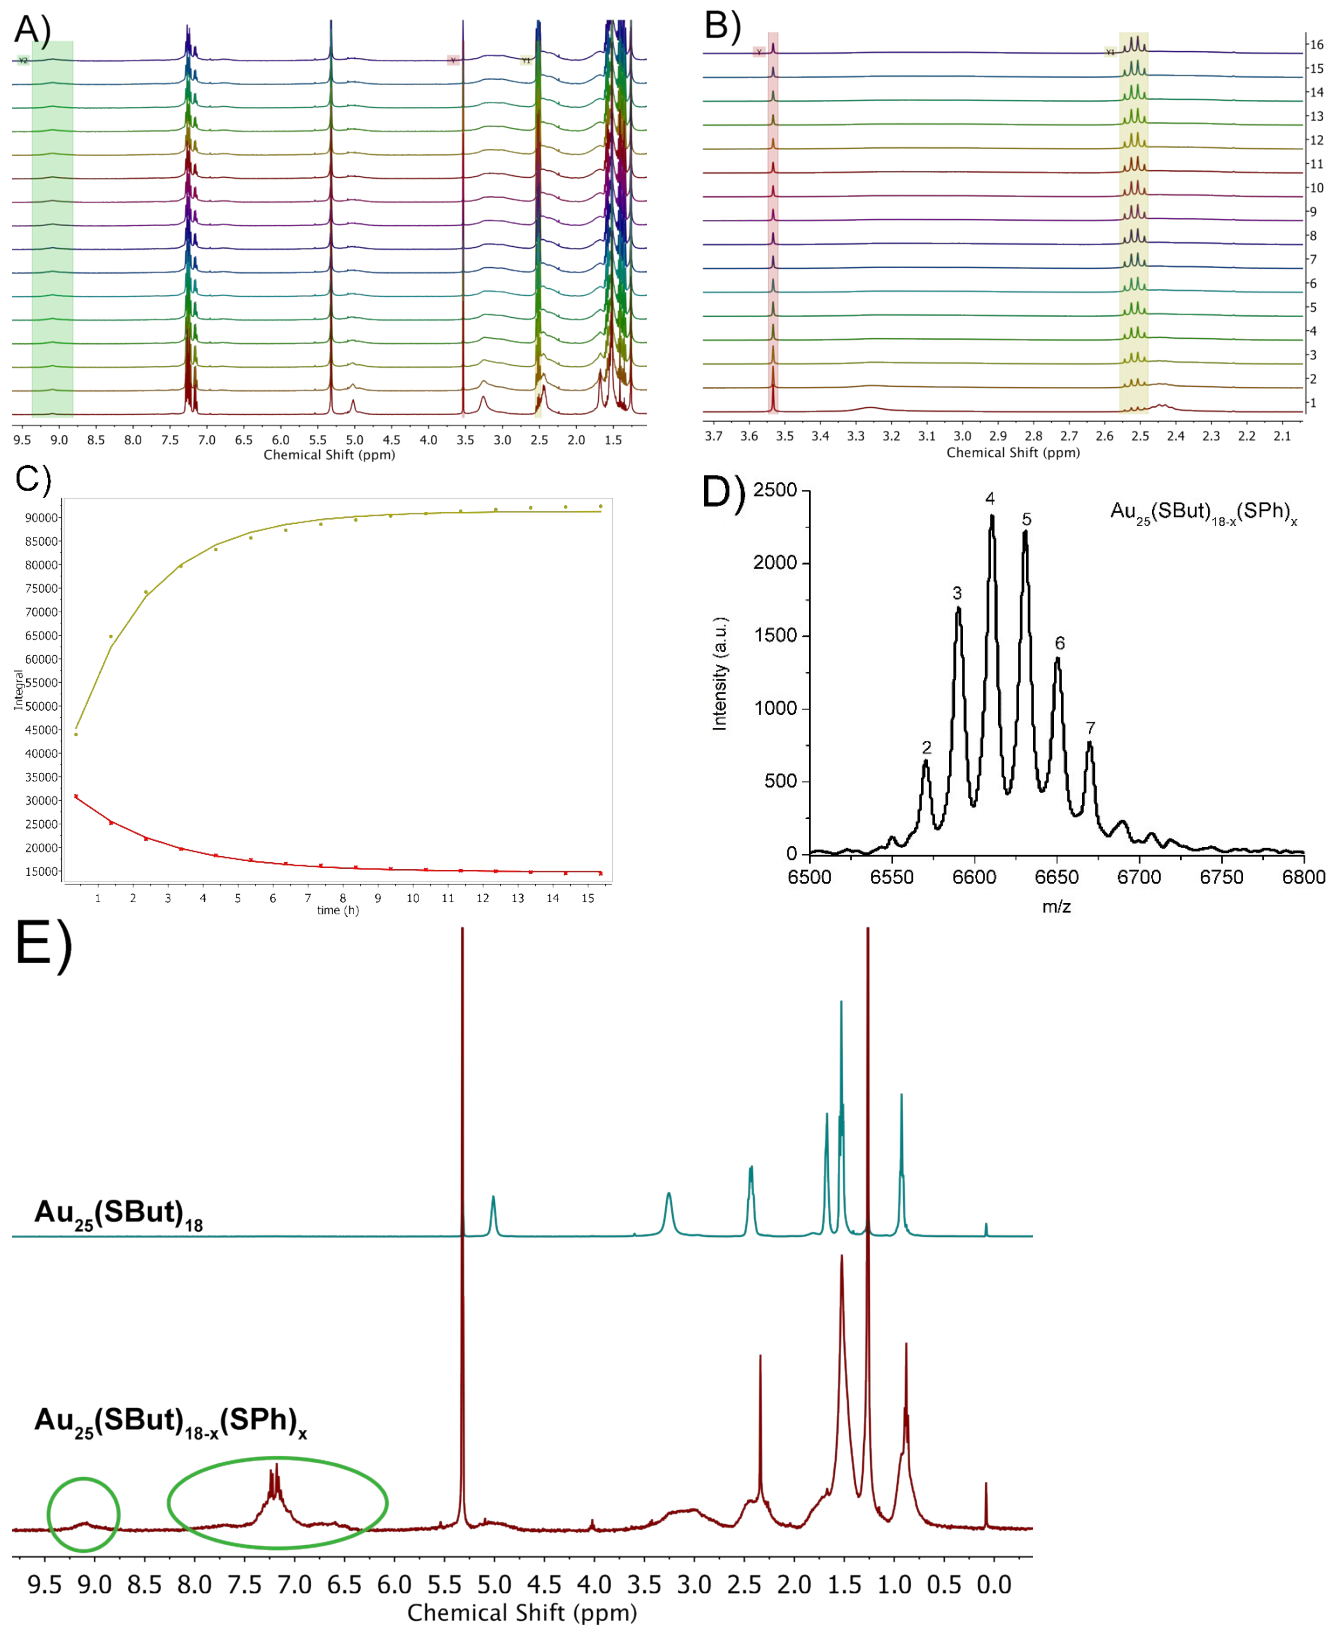

Figure S7: Full UV-vis spectra (A) of the unlinking reaction after addition of 1 equiv butanethiol to a multimers solution of approximately 0.23 mg/mL in THF (concentration approximated by UV-vis calibration) and MALDI (B) of the separated fractions afterwards.

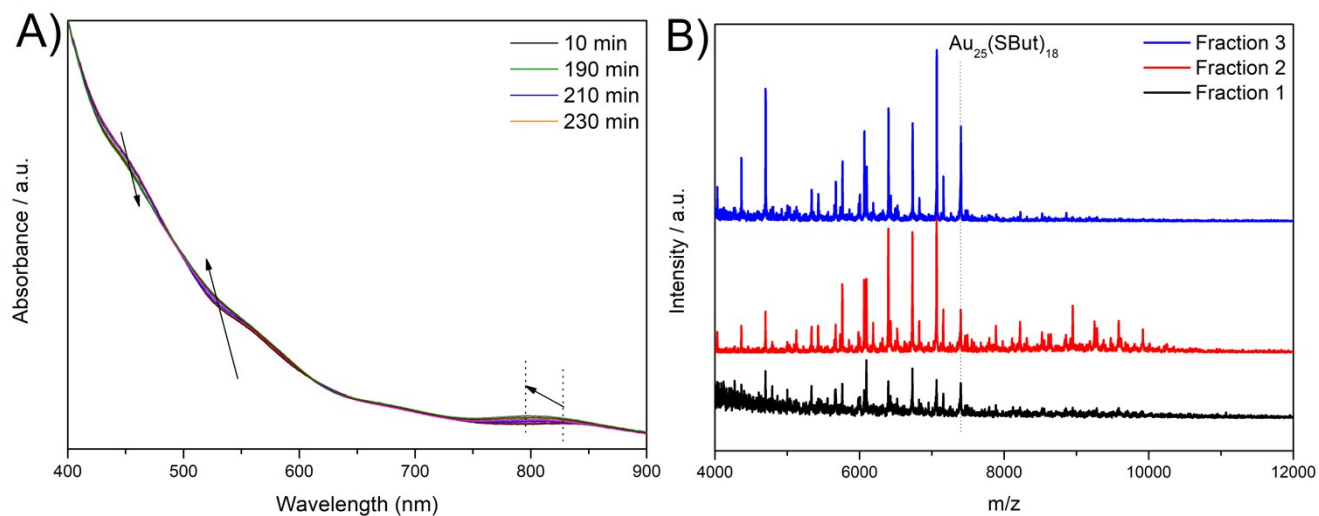

Figure S8: Unlinking reaction with the precipitated multimers. UV-vis analysis of the suspension of precipitated  $Au_{25}(SBut)_{18}$ -multimers (0h) and after addition of butanethiol (0,1 mL). UV-vis taken after 2h 20 min, 4h 30 min and 72h of reaction. After 72h the precipitate dissolved and UV-vis shows again the typical features (800-840 nm) of a multimer solution.

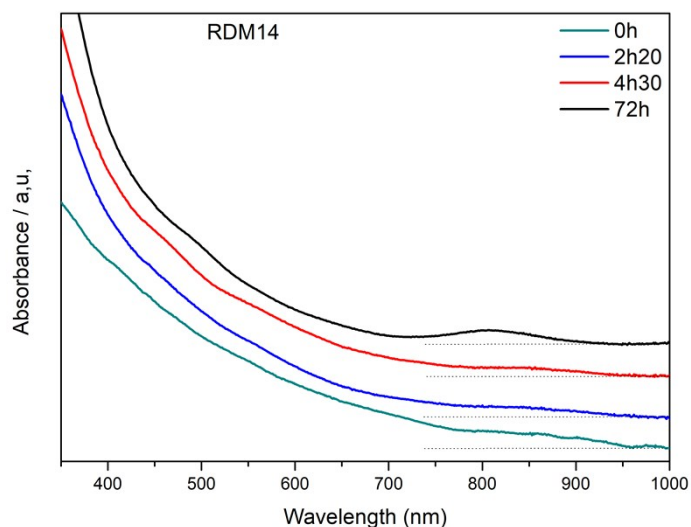

Figure S9: Linking reaction of  $Au_{25}(PET)_{18}^0$  with **2** (left) and **1** (right) (0.5 equiv dithiol, 0.5 mg/mL in THF).

SEC of  $Au_{25}(PET)_{18-x}(\mathbf{2})_x$  (left) confirmed presence of larger species, eluting faster than  $Au_{25}$ . Although MALDI does not show any additional peaks at higher mass range, UV-vis indeed shows a new feature at 840nm for Fraction 1. SEC of  $Au_{25}(PET)_{18-x}(\mathbf{1})_x$  (right) confirms presence of mostly unreacted  $Au_{25}$  as no clear fraction of linked clusters could be observed. It looks like PET-protected  $Au_{25}$  cluster does not form multimers using linker **1**. We think this results from a more sterically hindered PET ligand compared to butanethiol.

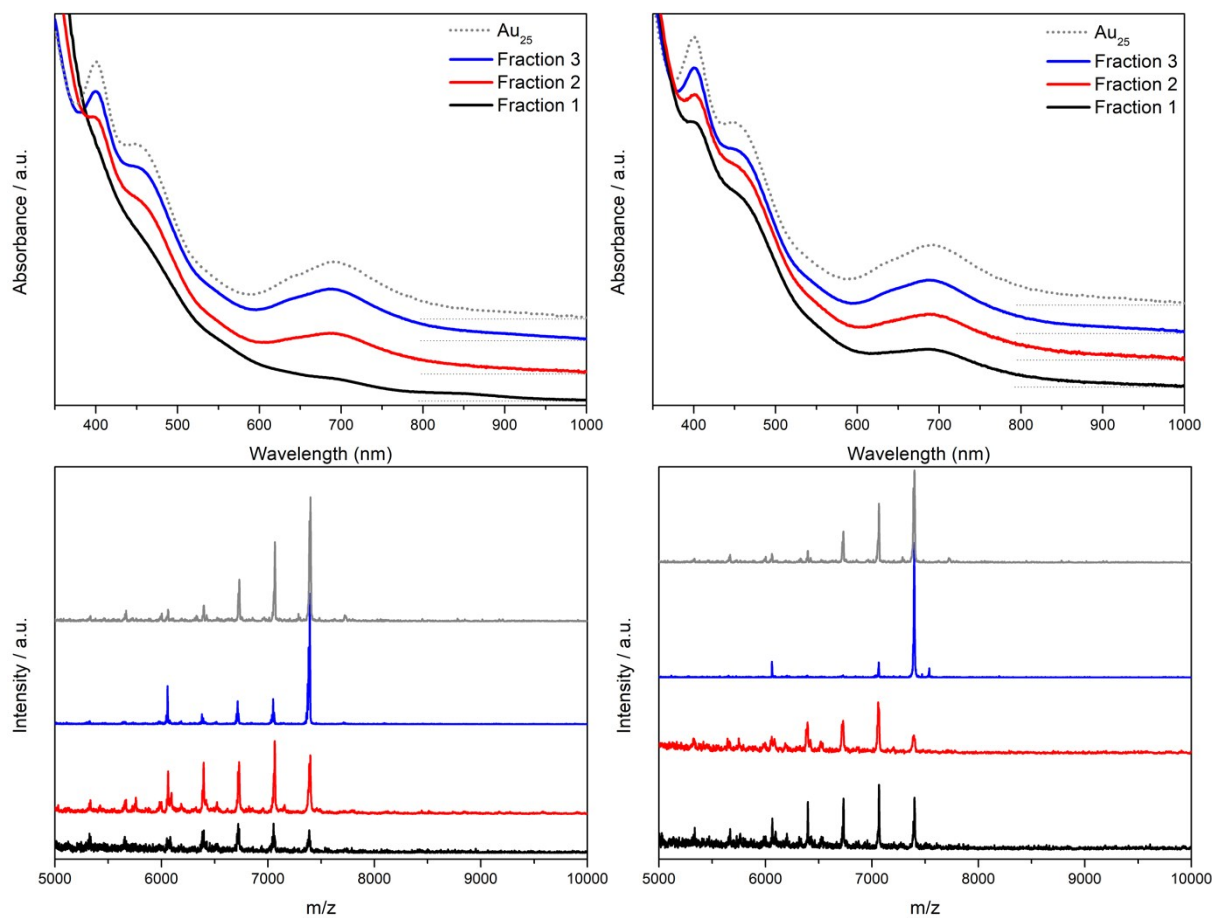

Figure S10: Linking reaction of  $Au_{25}(Sbut)_{18}^0$  with 1,4-Benzenedimethanethiol. A non-conjugated linker, 1,4-Benzenedimethanethiol was chosen in order to confirm the origin of the new peak (840 nm) in UV-Vis absorption spectra. (A) SEC of  $Au_{25}(SBut)_{18-x}(3)_x$  confirmed presence of larger species, eluting faster than  $Au_{25}$ . UV-Vis of the separated fractions all show typical  $Au_{25}$  features, also the first eluting species do not show the UV-vis feature of 840 nm. (B) MALDI of the last fraction shows the ligand exchange product of 1 exchanged dithiol. (D) MALDI of the first fraction gives indication of presence of larger species, however no clear peak can be observed. (C)

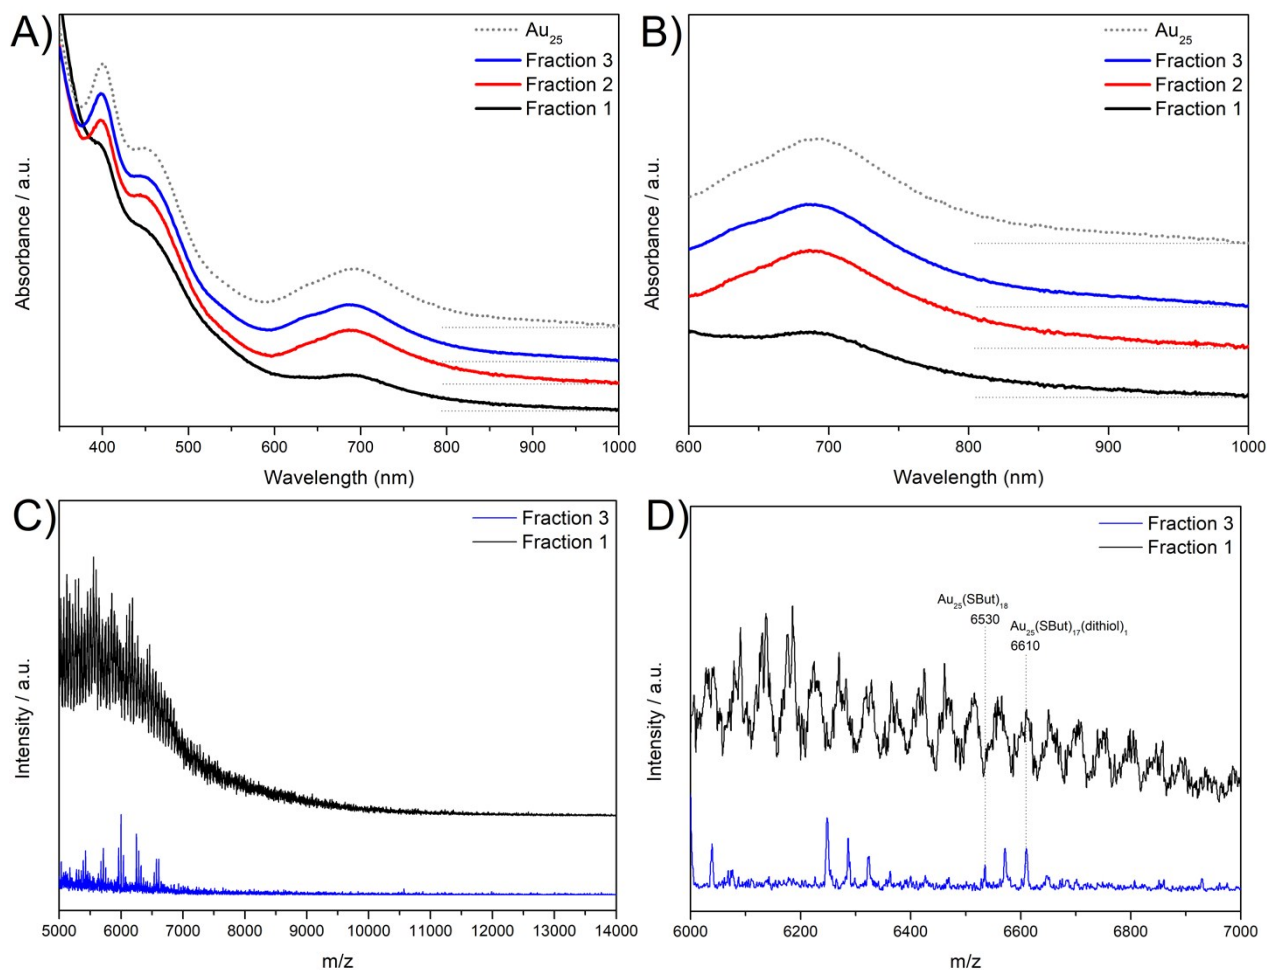



Figure S11: UV-Vis comparison of the first eluting fractions after linking. In both linking reactions using linker 1 and 2, a new feature at 840 nm appears at the same position. The first fraction with linker 3 shows only the typical  $Au_{25}$  feature (690 nm). The absorption spectra were not normalized, therefore intensities should not be considered significant.

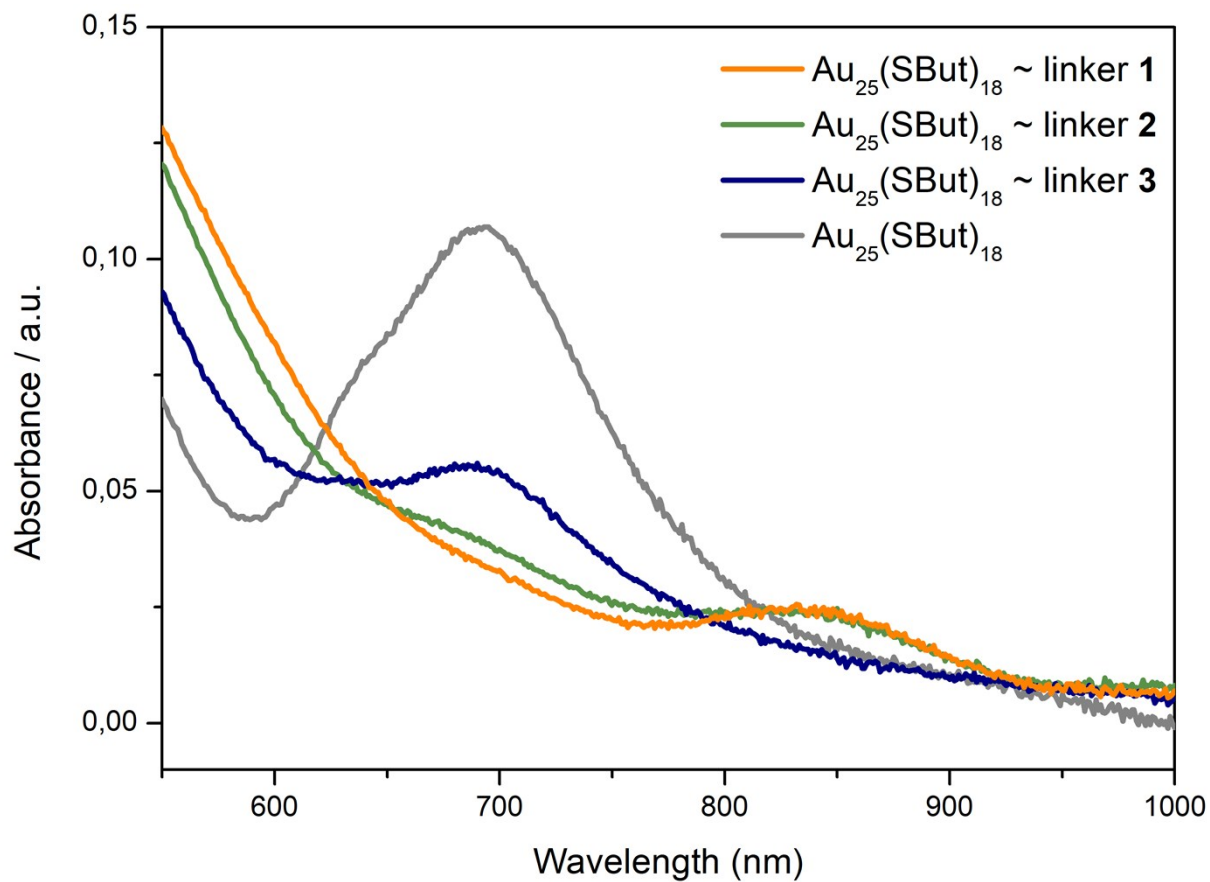

Figure S12: UV-vis of isolated fractions measured by SAXS. Fractions 1 (A) and zoom at higher wavelengths (B). All fractions show no longer the typical  $Au_{25}$  features but all show a signal at 840 nm. Fractions 2 (C) and zoom at higher wavelengths (D). All fractions have still some  $Au_{25}$  features, except the fraction of PET-protected  $Au_{25}$  linked with 2 who appears to show the UV-vis feature at 840 nm.

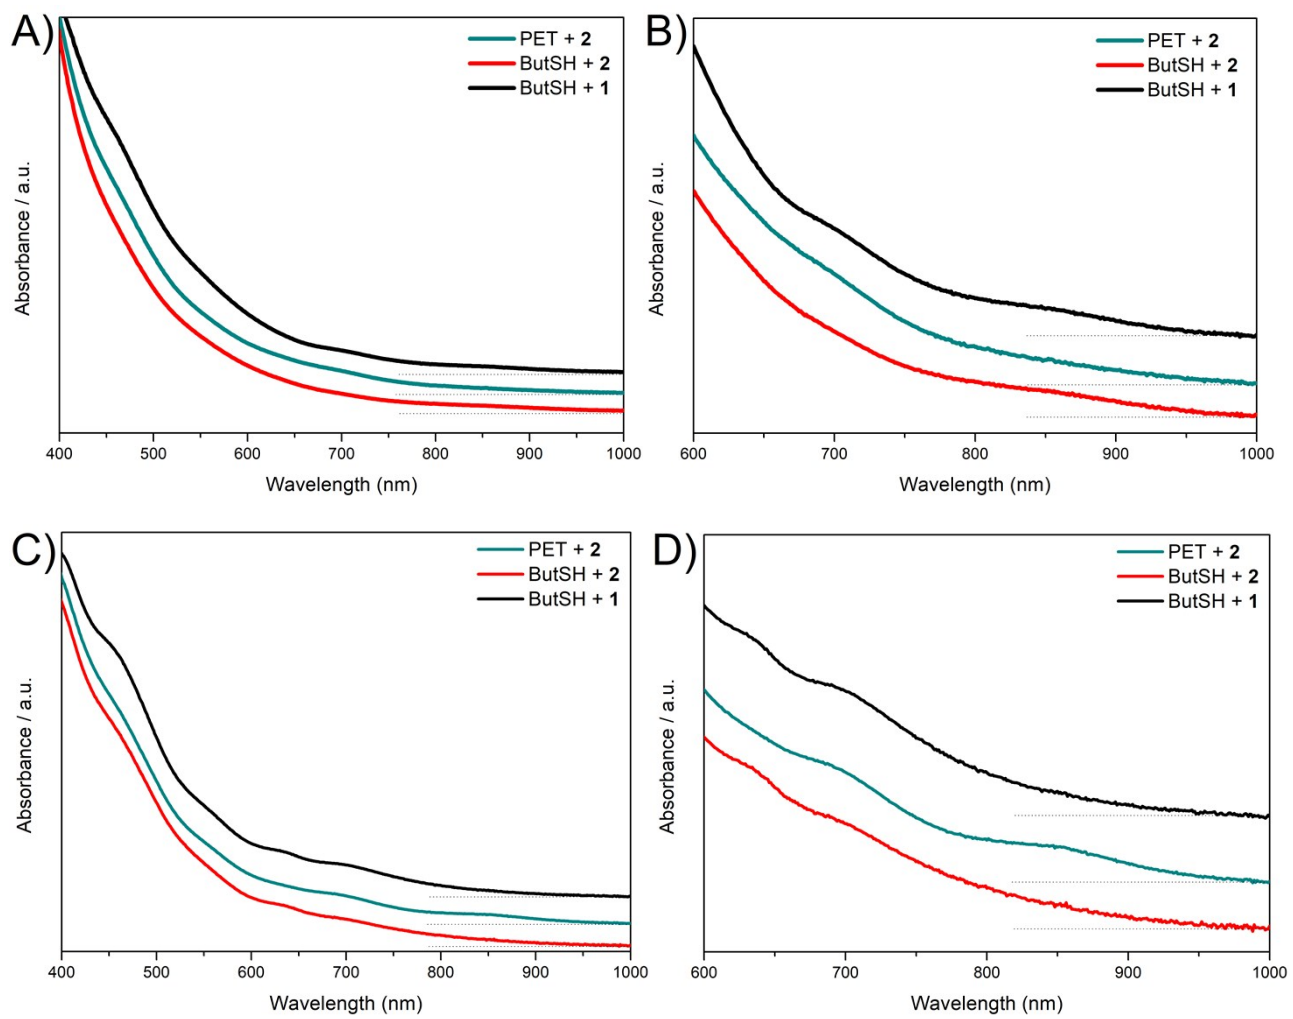

Figure S13: Non-normalized fitting of SAXS curves by SASVIEW (second fractions).  $Au_{25}(SBut)_{18}\sim 1$  is Sample 7;  $Au_{25}(SBut)_{18}\sim 2$  is Sample 6;  $Au_{25}(PET)_{18}\sim 2$  is Sample 5

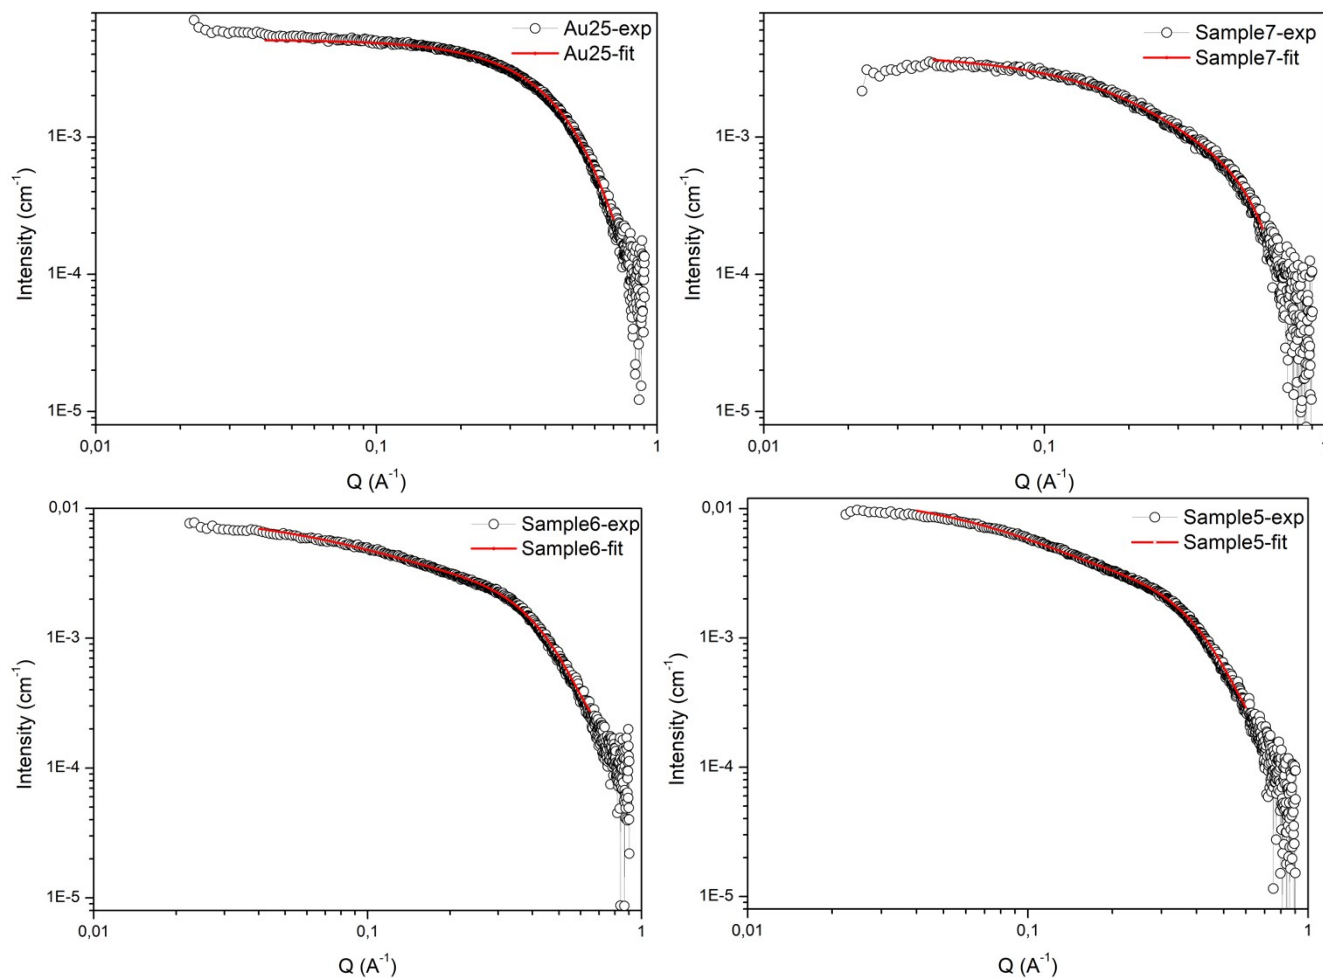

Supplement: c8nr01902a1.pdf [file c8nr01902a1.pdf]
